# Supplementary material for: Promotion of host folding during the formation of a taco complex
Source: Royal Society of Chemistry journal article supplement (doi:10.1039/b503092g), 2005-01-01
Supplement: b503092g.pdf [file b503092g.pdf]

## Promotion of host folding during the formation of a taco complex

Feihe Huang,<sup>a</sup> Matthew Lam,<sup>b</sup> Eric J. Mahan,<sup>a</sup> Arnold L. Rheingold<sup>b</sup> and Harry W. Gibson<sup>a\*</sup>

<sup>a</sup> Department of Chemistry, Virginia Polytechnic Institute and State University, Blacksburg, VA, USA 24061-0212. Fax: 01 540 231 8517; Tel: 01 540 231 5902; E-mail: hwgibson@vt.edu

<sup>b</sup> Department of Chemistry and Biochemistry, University of Delaware, Newark, DE, USA 19716

### Supplemental Material (1 page)

Determination of  $\Delta_0$  of  $H_1$  for Complexation between **1b** and **2** in Acetone- $d_6$

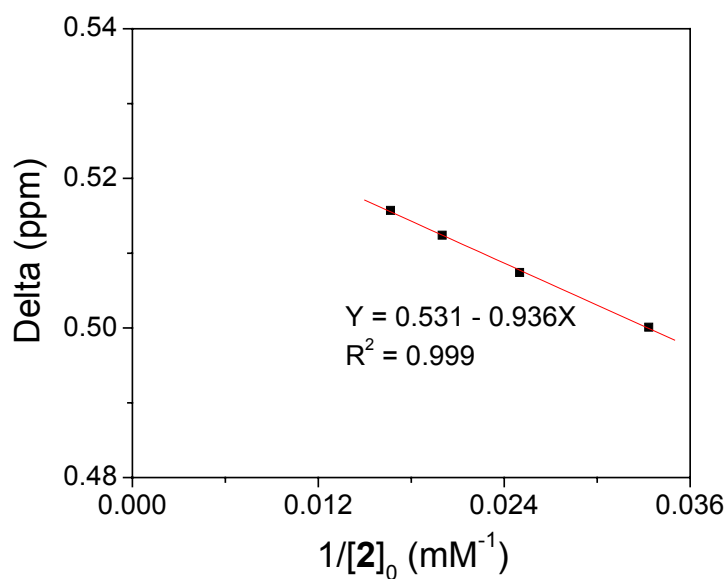

**Figure S1.** Relationship between  $\Delta$  and  $1/[2]_0$  for the complexation between **1b** and **2** in acetone- $d_6$  at 22°C.  $[1b]_0$  and  $[2]_0$  are initial concentrations of **1b** and **2**.  $[1b]_0$  is constant at 0.500 mM.
